# Supplementary material
Source: Springer Nature journal article supplement (https://www.springermedizin.de/resource/supplementary/12913_2012_2140_MOESM1_ESM.pdf/9529630)
Supplement: MOESM1 [file 9529630]

Identification & recruitment practices

Randomization

Intervention Arm

Recruitment of Clinicians & Patients

Clinical encounter use of decision aids

*Patients & clinicians post-encounter survey*

3&6 months

*Patients adherence & decision quality*

Interviews with Clinicians, Patients & Clinic Support Staff

Usual care Arm (Control)

Recruitment of Clinicians & Patients

Clinical encounter usual care

*Patients & clinicians post-encounter survey*

3&6 months

*Patients adherence & decision quality*

Interviews with Clinicians, Patients & Clinic Support Staff

Video recordings

Video recordings
